# Supplementary material for: Mapping quantitative trait loci and predicting candidate genes for Striga resistance in maize using resistance donor line derived from Zea diploperennis
Source: Front Genet. 2023 Jan 12;14:1012460. doi: 10.3389/fgene.2023.1012460 (PMC9877281; doi:10.3389/fgene.2023.1012460)
Supplement: Supplementary file 3 [file Table1.XLSX]

## Sheet: Sheet2
Table S2: Candidate gene annotation Candidate genes associated with the identified QTLs for key Striga resistance/tolerance indicator traits under artificial Striga infestation.
Trait	Chromosome	Pos	Right marker	Left marker	Genes	Sequence description
YIELDIN	2	23.8056	Chr2_21.824408	Chr2_24.239657	GRMZM2G475678,ereb61	ethylene-responsive transcription factor ERF061
					GRMZM5G805505,ereb87	AP2-EREBP-transcription factor 87
					GRMZM2G077002,gata5	gata5 - C2C2-GATA-transcription factor 5
					GRMZM2G062554,pco079297	pco079297(126), Vacuolar processing enzyme, beta-isozyme
					GRMZM2G178998,nactf131	nactf131 - NAC-transcription factor 131
					GRMZM2G320827,thx32	thx32 -Trihelix-transcription factor 32
					GRMZM5G825909,atg13c	atg13c - autophagy13c
					GRMZM2G016649,thx12	thx12 - Trihelix-transcription factor 12
					GRMZM2G019919,rws1	rws1 - RNA recognition water-stress protein1
					GRMZM5G857992,ckb1	ckb1 - CK2 regulatory subunit B1
					GRMZM2G337229,ole1	ole1 - oleosin1
					GRMZM2G055180,ereb198	AP2-EREBP-transcription factor 198
					GRMZM2G021044,sdg104	sdg104 - SET domain-containing protein SET104)
					GRMZM2G123387,wrky101	wrky101 - WRKY-transcription factor 101
					GRMZM2G123373,npi587
					GRMZM2G351330,hb66	hb66 - Homeobox-transcription factor 66
					GRMZM2G104166,cl36099_1a
					GRMZM2G404973,gata11	gata11 - C2C2-GATA-transcription factor 11
					GRMZM2G009208,rmr2	rmr2 - required to maintain repression 2
					GRMZM2G109244,TIDP3339
					GRMZM2G054795,yab1	yab1 - C2C2-YABBY-transcription factor 1
					GRMZM2G394450,ivr1	ivr1 - invertase1
YIELDIN	4	230.829	Chr4_228.266384	Chr4_232.427685	GRMZM2G085751,bhlh24	bhlh24 - bHLH-transcription factor 24
					GRMZM2G474119,IDP498
					GRMZM2G164359,c3h43	c3h43 - C3H-transcription factor 343 - putative RING zinc finger domain superfamily protein
					GRMZM2G148118,gpm871
					GRMZM2G060896,pco081586b
					GRMZM2G153597,vq24	vq24 - VQ motif-transcription factor24	Song et al., 2016 - VQ motif-containing proteins play crucial roles in abiotic stress responses in plants. Recent studies have shown that some VQ proteins physically interact with WRKY transcription factors to activate downstream genes.
					GRMZM2G033855
					GRMZM2G052102,bzip120	bzip120 - bZIP-transcription factor 120 - basic leucine zipper 19
					GRMZM2G081666,kch3	kch3 - potassium channel3
					GRMZM2G029058,pco071744
					GRMZM2G074122,pep3	pep3 - phosphoenolpyruvate carboxylase3
YIELDIN	5	76.7646	Chr5_68.355981	Chr5_77.117931	GRMZM2G053868,GRMZM2G157068,cdpk22	cdpk22 - calcium dependent protein kinase22
					GRMZM2G374574,pco125096
					GRMZM2G114888,pco147515
					GRMZM2G115047
					GRMZM2G128929,ldh1	ldh1 - lactate dehydrogenase1
					GRMZM2G089836,ivr2	ivr2 - invertase2
					GRMZM2G159142,cl4689_1
					GRMZM2G075624,tct1	tct1 - translationally controlled tumor1
					GRMZM2G074957,umc2530
					GRMZM2G074896,xt9	xt9 - beta-1,2-xylosyltransferase9
					GRMZM2G163866,nrt3	nrt3 - nitrate transport3
					GRMZM2G163849,brm1	brm1 - brahma1
					GRMZM2G020146,IDP781
					GRMZM2G020320,gpat10	gpat10 - glycerol-3-phosphate acyltransferase10
					GRMZM2G020366,pzb01112
					GRMZM2G088189,myb161	myb161 - MYB-transcription factor 161
					GRMZM2G389155,rup1	rup1 - repressor of UV-B photomorphogenesis homolog1
					GRMZM2G114793,bip1	bip1 - Binding protein homolog1
					GRMZM5G856837,bhlh129	bhlh129 - bHLH-transcription factor 129
					GRMZM5G806358,gtc102	gtc102 - global transcription factor C (Spt16)
					GRMZM2G044348,AY104079
					GRMZM2G098370,si945020c09
					GRMZM2G098420,atg5
					GRMZM2G120539,pco078009
					GRMZM2G466281,ufg60
					GRMZM2G164202,pprsmr4	pprsmr4 - pentatricopeptide repeat smr4
					GRMZM5G865943,pld17
					GRMZM5G803949,rop9	rop9 - Rho-related protein from plants 9
					GRMZM2G046615,tps2	tps2 - terpene synthase2
					GRMZM2G064406,tps3
					GRMZM2G065154,mate6	multidrug and toxic compound extrusion6
					GRMZM2G305124,sdg129	sdg129 - set domain gene129
					GRMZM2G477236,invan6	invan6 - invertase alkaline neutral6
					GRMZM2G153144,bzip14	bzip14 - bZIP-transcription factor 14
					GRMZM2G168747,nrat2	nrat2 - nramp aluminum transporter2
YIELDIN	8	168.079	Chr8_167.208138	Chr8_168.57293	GRMZM2G082362,GRMZM2G107484,msp3
					GRMZM2G107491,c3h49	c3h49 - C3H-transcription factor 349
					GRMZM2G042118,GRMZM2G470862,pco106379
					GRMZM2G030762,bhlh55	bhlh55 - bHLH-transcription factor 55
					GRMZM2G030717,psei10
					GRMZM2G166855,umc2361
					GRMZM5G898314,hdt104	hdt104 - histone deacetylase 104
					GRMZM2G065971,mgt8	mgt8 - magnesium transporter8	EEWQTL
					GRMZM2G066024,ald2	ald2 - aldolase2
					GRMZM2G339379,jmj11	jmj11 - JUMONJI-transcription factor 11
					GRMZM2G112079,IDP771
					GRMZM2G100318,arr7	arr7 - ARR-B-transcription factor 7
RAT1	2	172.806	Chr2_170.435702	Chr2_173.7557	GRMZM5G872070,umc2253
					GRMZM2G092125,pip2b	pip2b - plasma membrane intrinsic protein2
					GRMZM2G322661,cl803_1
RAT1	2	201.806	Chr2_201.773609	Chr2_203.194405	GRMZM2G080295,srs2	srs2 - SHI/STY (SRS)-transcription factor 2
					GRMZM2G367834,prrh1	pseudo-response regulator homolog1
					GRMZM2G002807,tpi2	tpi2 - triose phosphate isomerase2
					GRMZM2G050714,pco122302
					GRMZM2G042604,magi50422
					GRMZM2G050305,GRMZM5G892094,myb31	myb31 - MYB31 transcription factor31
					GRMZM2G050268,cl9864_1
					GRMZM2G409722,IDP456
					GRMZM2G108912,pld10	phospholipase D10
RAT1	3	13.8547	Chr3_11.79899	Chr3_14.131442	GRMZM2G150906,rafs1	raffinose synthase1
					GRMZM2G150838,pco127654b
					GRMZM2G066345,tar2	tar2 - tryptophan aminotransferase related2
					GRMZM2G023952,cyp24	cyp24 - cytochrome P-450 24
					GRMZM2G158342,asg48a
					GRMZM2G052377,myb20
					GRMZM2G069177,atg18c	autophagy18c
					GRMZM2G459861,npi276a
					GRMZM2G146627,tip4c	tonoplast intrinsic protein4
					GRMZM5G877259,pco121381a
					GRMZM2G333623,si660063f11
					GRMZM2G163291,smh5	smh5 - single myb histone5
					GRMZM2G379913,GRMZM2G379929,gpm697
RAT1	3	168.855	Chr3_168.531831	Chr3_169.071137	GRMZM2G113264,umc1973
					GRMZM2G006452,smc2	smc2 - structural maintenance of chromosomes2
					GRMZM2G006277,IDP667
					GRMZM2G013016,gras7	gras7 - GRAS-transcription factor 7
					GRMZM5G863784,si683006e11
					GRMZM2G059108,AY106230,pza01396
RAT1	10	110.698	Chr10_108.463928	Chr10_113.256953	GRMZM2G099696,fab1
					GRMZM2G313756,bhlh100
					GRMZM2G059965,AY109920
					GRMZM2G085892
					GRMZM2G439668
					GRMZM2G126194,abi21	abi21 - ABI3-VP1-transcription factor 21
					GRMZM2G152661,camta5	camta5 - CAMTA-transcription factor 5
					GRMZM2G151041,odo1	odo1 - alpha keto dehydrogenase candidate1
					GRMZM2G079538,kgdh1	kgdh1 - alpha-ketoglutarate dehydrogenase
					GRMZM2G151529,hcf106c	hcf106c - high chlorophyll fluorescence106c
					GRMZM2G149543,TIDP3243
					GRMZM2G149590,thx33	thx33 - Trihelix-transcription factor 33
					GRMZM2G451716,pco064258
					GRMZM2G425798,ereb149
					GRMZM2G023194,isp1	isp1 - iron-sulfur protein1
					GRMZM2G317406,mgs1	mgs1 - male-gametophyte specific1
					GRMZM2G424261,tcptf36	tcptf36 - TCP-transcription factor 36
					GRMZM2G023708,ereb125
RAT2	2	187.806	Chr2_187.67569	Chr2_187.918783	GRMZM2G159125,pld8	pld8 - phospholipase D8
RAT2	5	76.7646	Chr5_68.355981	Chr5_77.117931	GRMZM2G115176,pco138115
					GRMZM2G040311,pmei40	pmei40 - pectin methylesterase inhibitor40	Overlapping
					GRMZM2G008047,pmei43	pmei43 - pectin methylesterase inhibitor43
					GRMZM2G111760,thx22	Trihelix-transcription factor 22
					GRMZM2G063390
					GRMZM2G055251,pco062253a
					GRMZM2G068277,pco104710
					GRMZM2G065097,GRMZM2G132340,TIDP3746
					GRMZM2G344212,si618080f12
					GRMZM2G053830,GRMZM2G157046,GRMZM2G456088,cl6091_1b
					GRMZM2G524937,pco097858
RAT2	8	164.079	Chr8_161.923611	Chr8_164.863885
					GRMZM2G060723,trl1	trl1 - tassels replace upper ears-like1
					AC233953.1_FG005,hak2	potassium high-affinity transporter2
					GRMZM2G168552,bss1	bss1 - bundle sheath strands specific1
					GRMZM2G147709,pco065335b
					GRMZM2G038487,pco079065e
					GRMZM2G133885,cl40750_1
					GRMZM2G133952,mlh1	mlh1 - mutatorL homolog1
					GRMZM2G435034,pco091316
					GRMZM2G059299
					GRMZM2G059191
					GRMZM2G059117
					GRMZM2G083117
					GRMZM2G077752,GRMZM5G816228,lrp1	lrp1 - lateral root primordia1
					GRMZM2G319187,crr4	crr4 - cytokinin response regulator4
					GRMZM2G016827,umc2711
					GRMZM5G861678,elm1	elm1 - elongated mesocotyl1
					GRMZM2G129154,gras2	GRAS-transcription factor 2
					GRMZM2G129157,ebe1	embryo-sac basal-endosperm layer embryo-surrounding-region
					GRMZM2G467069,hex9	hex9 - hexokinase9
					GRMZM2G167220,cko3	cytokinin oxidase 3
					GRMZM2G005459,pco079656
					GRMZM2G118515,tcp1	tcp1 - thiamine diphosphate carrier protein1
					GRMZM2G122607,atg18a	atg18a - autophagy18a
					GRMZM2G302045,gpm184
					GRMZM2G302074
CO1	2	12.8056	Chr2_12.757631	Chr2_13.95377	GRMZM2G180190,zfl2	zfl2 - Zea floricaula leafy2
					GRMZM2G149556
					GRMZM2G024898,wrky70
					GRMZM2G463280,IDP445
					GRMZM2G162230,IDP1971
					GRMZM2G038722,myb13
					GRMZM2G014534,mybr36	mybr36 - MYB-related-transcription factor 36
					GRMZM2G131280,platz5	platz5 - PLATZ-transcription factor 5
					GRMZM2G090271,cp33b	cp33b - chloroplast RNA-binding protein33b
CO1	7	41.8466	Chr7_39.974564	Chr7_43.809836
					GRMZM2G162409,glk15	glk15 - G2-like-transcription factor 15
					GRMZM2G075715,arftf37	arftf37 - ARF-transcription factor 37
					GRMZM2G022014,IDP84
					GRMZM2G148056
					GRMZM2G154178,expb4	expb4 - beta expansin4
					GRMZM2G014914,pip2e	pip2e - plasma membrane intrinsic protein2
					GRMZM2G047368,pip2f
					GRMZM2G173923,GRMZM2G386350,caf1	caf1 - crs2 associated factor1
STRC0_1	2	215.806	Chr2_215.446898	Chr2_215.96096	GRMZM2G383841,bhlh147	bhlh147 - bHLH-transcription factor 147
					GRMZM2G177110,lbd14	lbd14 - LBD-transcription factor 14
					GRMZM2G125501,gras73	GRAS-transcription factor 73
					GRMZM2G175718,si605094e02a
					GRMZM2G378106,aas2	auxin amido synthetase2
STRC0_1	3	11.8547	Chr3_11.798990	Chr3_14.131442	AC233943.1_FG002,ra2
STRC0_1	5	212.765	Chr5_211.699547	Chr5_213.923453	GRMZM2G070045,GRMZM2G116981,gpm87
					GRMZM5G812555,nbcs16	nbcs16 - nucleobase:cation symporter16
					GRMZM2G415327,rop1	rop1 - Rho-related protein from plants 1
					GRMZM2G074267,pin2	pin2 - PIN-formed protein2
					GRMZM2G140651,pco127689(449)
					GRMZM2G105844,expa2	expa2 - alpha expansin2
					GRMZM2G105791,gss1	gss1 - starch synthase homolog1
					GRMZM2G105644,ggh1	ggh1 - geranylgeranyl hydrogenase1
					GRMZM2G105641,nlp12	nlp12 - NLP-transcription factor 12
					GRMZM2G028325,nip2a	nip2a - NOD26-like membrane intrinsic protein2
					GRMZM2G077755,tcptf26	tcptf26 - TCP-transcription factor 26
					GRMZM2G130548
					GRMZM2G130459,ereb187
					GRMZM2G036092,bhlh30
					GRMZM2G118366,umc1375
					GRMZM2G320786,lac19	lac19 - laccase19
					GRMZM2G017355,mterf18	mterf18 - mTERF domain protein7b
					GRMZM2G017429,mterf19	mterf19 - mTERF-domain protein19
					GRMZM5G862663,atpc1	atpc1 - ATP synthase chloroplast subunit1)
					GRMZM2G035708,cl61634_1
					GRMZM2G055204,ereb18
					GRMZM2G055150,trpp7	trpp7 - trehalose-6-phosphate phosphatase7
STRC0_1	7	109.847	Chr7_109.161107	Chr7_111.241692	GRMZM2G070885,jmj5	jmj5 - JUMONJI-transcription factor 5
					GRMZM2G450488,AY109968
					GRMZM2G136032,pip1f	pip1f - plasma membrane intrinsic protein1
					GRMZM2G082264,mwp1	mwp1 - milkweed pod1
					GRMZM2G019183,trps13	trps13 - trehalose-6-phosphate synthase13
STRC0_1	8	166.079	Chr8_165.13959	Chr8_166.861798	GRMZM2G054380,pza00838,sdg118	sdg118 - set domain gene118
					GRMZM2G105005,umc1149
					GRMZM2G000581,xt6	xt6 - beta-1,4-xylosyltransferase6
					GRMZM2G134256,GRMZM5G828312,IDP2350
					GRMZM2G134073,nactf9	nactf9 - NAC-transcription factor 9
					GRMZM2G146885
					GRMZM2G027857,atg6b	atg6b - autophagy6b
					GRMZM2G364863,GRMZM5G825025
					GRMZM2G461793,cl9362_1
					GRMZM2G371033,sbp18	sbp18 - SBP-transcription factor 18
					GRMZM2G481103,TIDP3731
					GRMZM2G180399,sacd2	sacd2 - stearoyl-acyl-carrier-protein desaturase2
STRC0_1	9	14.1876	Chr9_13.152043	Chr9_14.927006	GRMZM2G109720,csu471
					GRMZM2G008326,GRMZM5G871846,IDP2364
					GRMZM2G156006,ereb207
					GRMZM2G455557,GRMZM2G455568,mha8	mha8 - membrane H(+)-ATPase8
					GRMZM2G072550,umc1238
					GRMZM2G149132,dbptf3	dbptf3 - DBP-transcription factor 3
					GRMZM2G047138,TIDP2976
					GRMZM2G014240,vpp6	vpp6 - vacuolar proton pump6
					GRMZM2G300408,tha5	tha5 - thylakoid assembly5
					GRMZM2G000423,gpm626
					GRMZM2G023760,sudh8	sudh8 - succinate dehydrogenase8
					GRMZM2G167156,gpm602a
					GRMZM2G167207,bsdtf9	bsdtf9 - BSD-transcription factor 9
					GRMZM2G007957,umc2219
					GRMZM2G402156,mybr19
					GRMZM2G100873,IDP2570
CO2	6	109.963	Chr6_109.843392	Chr6_110.17186	GRMZM2G129783,ppr346	ppr346 - pentatricopeptide repeat protein346
EPPIN	1	46.8283	Chr1_43.333475	Chr1_46.957478	GRMZM2G017792,mpk3	mpk3 - MAP kinase3
					GRMZM2G043291,GRMZM2G338131,pco124824
					GRMZM2G042639,saf1	saf1 - safener induced1
					GRMZM2G042032,umc1479
					GRMZM2G109967,pco115659
					GRMZM2G052581,spo3	spo3 - topoisomerase-like enzyme3
					GRMZM2G137839,apx3	apx3 - ascorbate peroxidase homolog3
					GRMZM2G141273,gpm121
					GRMZM2G443265,pco085840
					GRMZM2G141386,rrm1	rrm1 - RNA recognition motif1
					GRMZM2G179462,pmpm4	pmpm4 - proteolipid membrane potential regulator4
					GRMZM2G319781,IDP112
					GRMZM2G021095,lbd4	lbd4 - LBD-transcription factor 4
					GRMZM2G073628,GRMZM2G443655,pdi9	pdi9 - protein disulfide isomerase9
					GRMZM2G107867,akin2	akin2 - AKINbetagamma-1 protein kinase2
					GRMZM2G173251,imd1	imd1 - isopropylmalate dehydrogenase1
					GRMZM2G074401,fad8	fad8 - fatty acid desaturase8
					GRMZM2G053669,asn3	asn3 - asparagine synthetase3
					GRMZM2G087186,GRMZM5G832375,pdc3	pdc3 - pyruvate decarboxylase3
					GRMZM2G307992,IDP643
					GRMZM2G308034,ms9	ms9 - male sterile9
					GRMZM2G007206,TIDP2814
					GRMZM2G032047,AY110632
					GRMZM2G029543,pco095766
					GRMZM2G144224
					GRMZM5G814718,lac12	lac12 - laccase12
					GRMZM2G455809,ts2	ts2 - tassel seed2
EPPIN	6	0.9626	Chr6_0.962638	Chr6_1.844908	GRMZM2G004435,pgl10	pgl10 - exopolygalacturonase10
					GRMZM2G098174,si687085b03
					GRMZM2G122357,pco068404
					GRMZM2G122337,fdx1	fdx1 - ferredoxin1
					GRMZM2G122327,fdx5	fdx5 - ferredoxin5
					GRMZM2G048313,fdx2	fdx5 - ferredoxin5
					GRMZM2G039895,phd1	PHD-transcription factor 1
